# Supplementary material
Source: MDPI journal article supplement (https://www.mdpi.com/2312-7481/7/9/128)
Supplement: s1 [file s1 › magnetochemistry-1353742-Supplementary.pdf]

# The Effect of pH and Buffer on Oligonucleotide Affinity for Iron Oxide Nanoparticles

Ekaterina Bobrikova, Alexey Chubarov\* and Elena Dmitrienko\*

Institute of Chemical Biology and Fundamental Medicine, SB RAS 630090 Novosibirsk, Russia

Magnetic nanoparticles (MNPs) were characterized using dynamic light scattering (DLS) on a Malvern Zetasizer Nano device (Malvern Instruments, Great Britain). For DLS studies, nanoparticles were diluted in deionized water to a concentration of 300  $\mu\text{g/mL}$ .

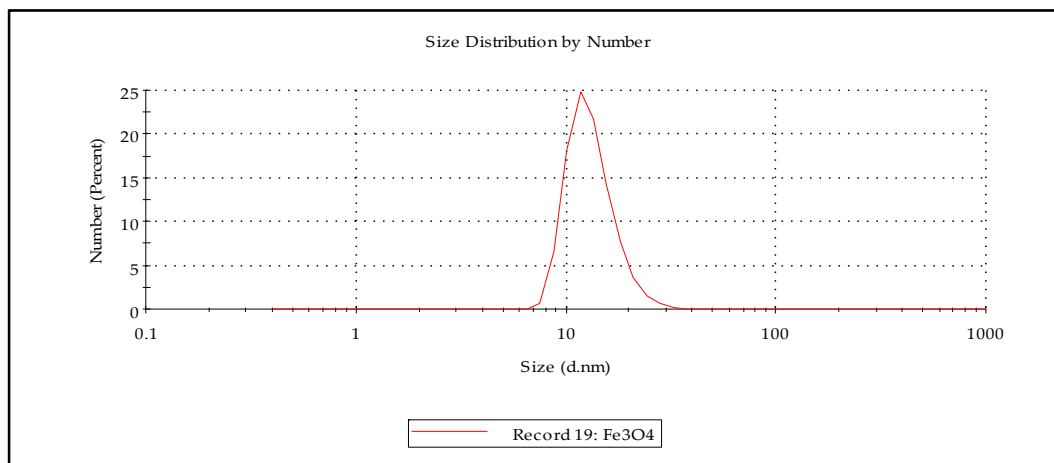

**Figure S1.** DLS size distribution of magnetic nanoparticles. The particle size was determined by the DLS method to be  $15.57 \pm 2.18$  nm, with a polydispersity index (PDI) of  $0.296 \pm 0.03$  and a  $\zeta$ -potential of  $36 \pm 1$  mV.

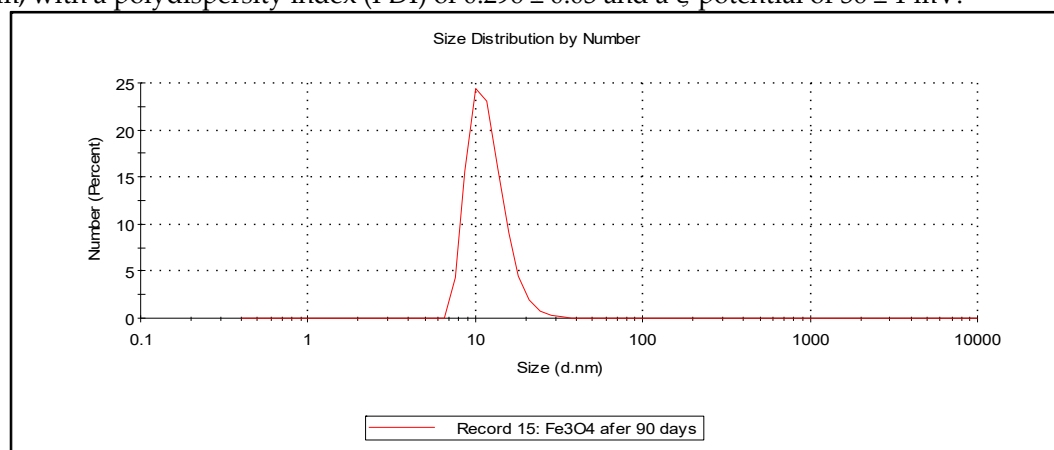

**Figure S2.** DLS size distribution of magnetic nanoparticles after 90 days of storage. The particle size was determined by the DLS method to be  $14.35 \pm 1.29$  nm, with a PDI of  $0.307 \pm 0.04$  and a  $\zeta$ -potential of  $36 \pm 1$  mV.

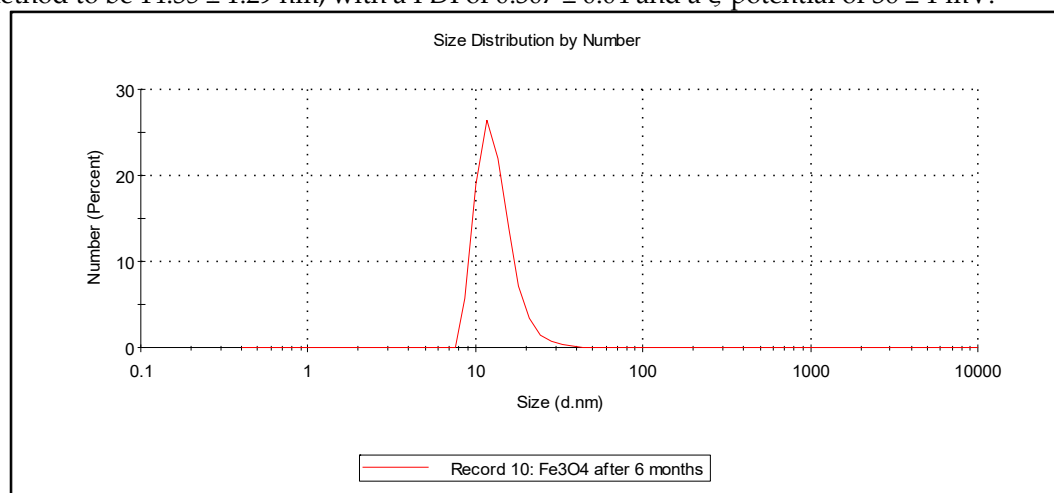

**Figure S3.** DLS size distribution of magnetic nanoparticles after six months of storage. The particle size was determined by the DLS method to be  $14.75 \pm 1.47$  nm, with a PDI of  $0.297 \pm 0.02$  and a  $\zeta$ -potential of  $36 \pm 1$  mV.

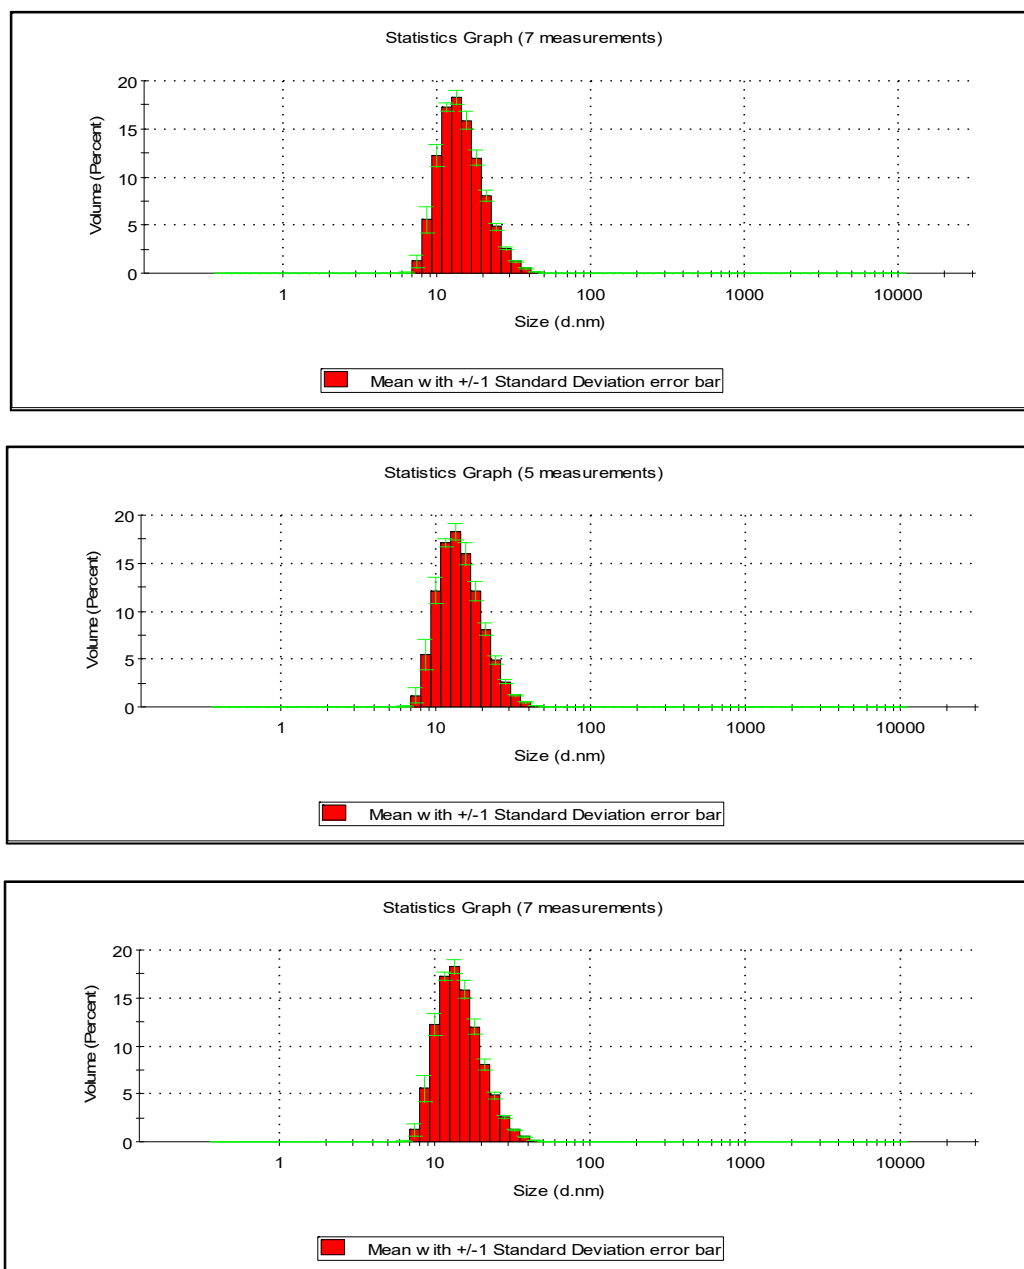

**Figure S4.** DLS volume distribution of fresh magnetic nanoparticles (up), after 90 days (in the middle), after six months (bottom).

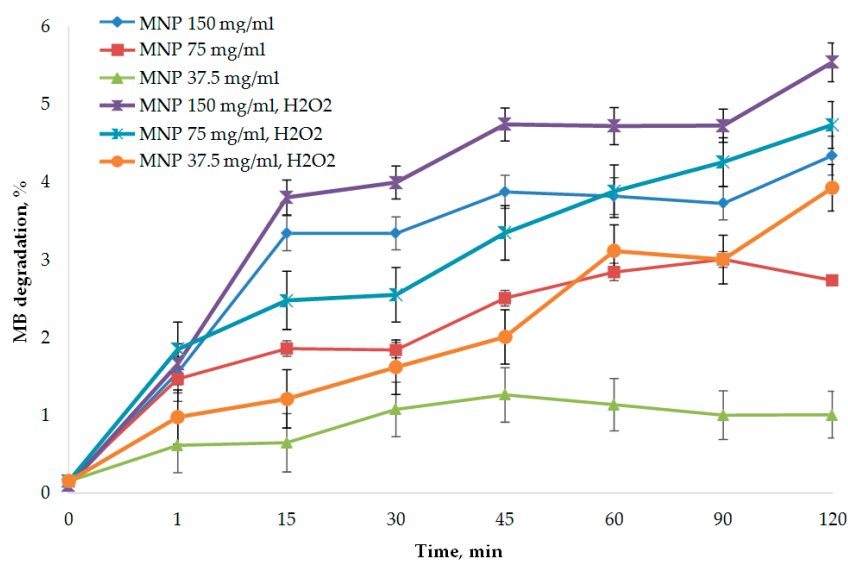

**Figure S5.** Methylene blue (MB) degradation assay in the presence and absence of H<sub>2</sub>O<sub>2</sub> as an oxidizing agent. The MB degradation % was calculated from the absorbance decrease at 665 nm using a Clariostar plate reader (BMG Labtech, Germany). The reactions were carried out using 37.5  $\mu$ g/ml, 75  $\mu$ g/ml, and 150  $\mu$ g/ml MNP.
